# Supplementary material for: Is corporate social responsibility sufficient enough to explain the investment by socially responsible funds?
Source: Springer Nature journal article supplement (doi:10.1007/s11156-016-0605-x), 2016-10-18
Supplement: MOESM1 [file 10901386]

**Online Appendix**

The literature investigates the relation between SRI mutual funds and firm CSR using the changes in firm KLD scores alone. This approach fails to address the sensitivity of SRI funds while making their investment decisions. I build a model similar to the one in the literature using only firm CSR measures as the main variable of interest: Δ All KLD, Δ Employee KLD, Δ Society KLD, Δ Governance KLD, and Δ Environment KLD. By doing so, I can compare my original results to the findings of that model. The dependent variable is the percentage changes in SRI mutual funds’ ownership in firms between consecutive years. The fixed effects model comprises year and Fama-French industry dummies. Standard errors are clustered by funds and firms. The model is specified as follows:

(A.1)

where Y is the percentage change in SRI mutual fund ownership; Z is firm Δ KLD scores for different CSR areas; the firm-fund observation is i = 1, … , N; the entire period is t = 2003, … , 2012; the number of firm control variables is l = 1, … , 10; the number of fund control variables is k = 1, 2; and α, β, γ, δ, μ are the coefficients of the constant term, firm Δ KLD scores for different CSR areas, firm controls, fund controls, and error term, respectively.

| Table A.1: Analysis for SRI Fund Ownership Decision via Firm CSR Scores Only  The table presents estimates from fixed effects panel regressions of changes in SRI fund ownership in firms on changes in different firm KLD measures. Dependent variable is the percentage change in SRI fund’s ownership in each firm’s shares at the given year. Key predictor variables are Δ All KLD, Δ Employee KLD, Δ Society KLD, Δ Environment KLD, and Δ Governance KLD. Observations are based on fund-firm-year level. All regressions include one year lagged firm and fund control variables. Variable definitions are available in Table A.3, Appendix. Fixed effects are at the firm-fund level and year fixed effects are included. Standard errors are clustered at the fund-firm level. The *** indicates statistical significance at the 1% level. | | | | | |
| --- | --- | --- | --- | --- | --- |
|  | % Change in Ownership | | | | |
|  | I | II | III | IV | V |
| Δ All KLD | 0.021** |  |  |  |  |
|  | (0.009) |  |  |  |  |
| Δ Employee KLD |  | 0.015 |  |  |  |
|  |  | (0.018) |  |  |  |
| Δ Society KLD |  |  | 0.007 |  |  |
|  |  |  | (0.012) |  |  |
| Δ Environment KLD |  |  |  | 0.088*** |  |
|  |  |  |  | (0.027) |  |
| Δ Governance KLD |  |  |  |  | 0.062*** |
|  |  |  |  |  | (0.023) |
| Firm Size | 0.014 | 0.026 | 0.022 | 0.012 | 0.024 |
|  | (0.170) | (0.170) | (0.170) | (0.170) | (0.170) |
| M/B | -0.079 | -0.079 | -0.080 | -0.077 | -0.080 |
|  | (0.058) | (0.058) | (0.058) | (0.058) | (0.058) |
| Profitability | -0.037 | -0.033 | -0.033 | -0.043 | -0.031 |
|  | (0.052) | (0.052) | (0.052) | (0.052) | (0.052) |
| Leverage | -0.106** | -0.104* | -0.103* | -0.107** | -0.109** |
|  | (0.053) | (0.053) | (0.053) | (0.053) | (0.053) |
| Volatility | 0.032 | 0.033 | 0.032 | 0.031 | 0.029 |
|  | (0.037) | (0.037) | (0.037) | (0.037) | (0.037) |
| Growth | 0.039 | 0.043 | 0.043 | 0.037 | 0.040 |
|  | (0.061) | (0.061) | (0.061) | (0.060) | (0.061) |
| Dividend | -0.061* | -0.063* | -0.063* | -0.062* | -0.058* |
|  | (0.034) | (0.034) | (0.034) | (0.034) | (0.034) |
| Cash | -0.057 | -0.059 | -0.059 | -0.057 | -0.059 |
|  | (0.086) | (0.086) | (0.086) | (0.086) | (0.086) |
| R&D | -0.032 | -0.032 | -0.033 | -0.033 | -0.033 |
|  | (0.041) | (0.041) | (0.041) | (0.040) | (0.041) |
| HHI | 0.033 | 0.034 | 0.035 | 0.036 | 0.036 |
|  | (0.032) | (0.032) | (0.032) | (0.032) | (0.032) |
| Fund Return | 0.623*** | 0.614*** | 0.614*** | 0.624*** | 0.619*** |
|  | (0.140) | (0.140) | (0.140) | (0.140) | (0.140) |
| Fund Size | -0.438*** | -0.438*** | -0.439*** | -0.437*** | -0.439*** |
|  | (0.111) | (0.111) | (0.111) | (0.110) | (0.111) |
| Constant | 1.081*** | 1.064*** | 1.061*** | 1.085*** | 1.069*** |
|  | (0.187) | (0.187) | (0.187) | (0.188) | (0.188) |
| Fixed Effects | YES | YES | YES | YES | YES |
| Year & Industry Dummies | YES | YES | YES | YES | YES |
| Observations | 9301 | 9301 | 9301 | 9301 | 9301 |
| Adjusted R-squared | 0.039 | 0.038 | 0.038 | 0.040 | 0.039 |

| Table A.2: Correlation Analysis between SRI Fund Ownership and Firm KLD Measure for Different Levels of Fund CSR Sensitivity  The table presents the correlation analysis for changes in SRI fund ownership and changes in different firm KLD measures. The analysis is conducted for different sub-samples determined by different levels of Fund CSR Sensitivity: Funds with high (top quintile), medium (mid quintile), and low (bottom quintile) sensitivity towards different CSR areas. Variable definitions are available in Table A.3, Appendix. | | | |
| --- | --- | --- | --- |
|  | % Change in Ownership | | |
| Fund CSR Sensitivity:  (All, Employee, Society, Environment, Governance) | Top  Quintile | Mid  Quintile | Bottom Quintile |
| All Sensitivity *Δ All KLD | 0.016 | 0.073 | 0.023 |
| Employee Sensitivity * Δ Employee KLD | 0.020 | 0.098 | 0.012 |
| Society Sensitivity *Δ Society KLD | 0.012 | 0.044 | -0.005 |
| Environment Sensitivity * Δ Environment KLD | 0.055 | 0.019 | -0.001 |
| Governance Sensitivity * Δ Governance KLD | 0.035 | -0.007 | 0.031 |

| Table A.3: Definition of Variables | |
| --- | --- |
| CORPORATE SOCIAL RESPONSIBILITY VARIABLES | |
| All KLD (pos) | Total number of all “KLD Strengths”across seven major issue areas: Community, Corporate Governance, Diversity, Employee Relations, Environment, Human Rights, Product. Maximum value for this variable is 56. |
| All KLD (neg) | Total number of all “KLD Concerns”across seven major issue areas and six special issue areas: Community, Corporate Governance, Diversity, Employee Relations, Environment, Human Rights, Product, and Alcohol, Firearms, Gambling, Military, Nuclear Power, Tobacco. Maximum value for this variable is 59 (=53+6). |
| All KLD | It equals All KLD Level (pos) minus All KLD Level (neg). |
| Employee KLD | It equals number of KLD Strengths (max 12) minus number of KLD Concerns (max 7) in Employee Relations and Human Rights areas. |
| Society KLD | This group is a combination of four major issue areas: Community, Diversity, Employee Relations, and Human Rights. It equals number of KLD Strengths (max 33) minus number of KLD Concerns (max 26) in these four issue areas combined. |
| Environment KLD | It equals number of KLD Strengths (max 10) minus number of KLD Concerns (max12) in Environment area. |
| Governance KLD | It equals number of KLD Strengths (max 8) minus number of KLD Concerns (max10) in Corporate Governance area. |
| Δ All KLD | It is the difference between All KLD score of the current year and the prior year. In the same way, I calculate Δ All KLD (pos), Δ All KLD (neg), Δ Environment KLD, Δ Employee KLD, Δ Society KLD, and Δ Governance KLD. |
| SOCIALLY RESPONSIBLE INVESTMENT (SRI) MUTUAL FUND VARIABLES | |
| SRI Fund CSR Sensitivity | Bloomberg's Environmental, Social and Governance (ESG) Service data provide a detailed classification of SRI mutual funds based on their reaction to the specific CSR level changes in firms. Those CSR groups include Environment, Governance, Social, and Shareholder Engagement & Others with 17 criteria in total. The possible reactions by funds are “Positive Investment” (the fund invests in a firm if the firm's matching CSR level increases, but does nothing if the level decreases), “Restricted Investment” (the fund withdraws the investment from a firm if the firm's matching CSR level decreases, but does nothing if the level increases), and “Full Investment” (the fund invests in a firm if the firm's matching CSR level increases, and withdraws the investment from the firm, otherwise). A fund earns one point for either of the first two types of reaction, or two points for Full Investment in regards to each of 17 criteria. Using those 17 Bloomberg's ESG criteria, I construct “Fund CSR Sensitivity” groups matching to the firm KLD groups: All, Employee, Society, Governance and Environment. Lastly, for each fund, the total points earned for a CSR Sensitivity group are normalized by the maximum possible points for that group. This method produces the following Fund CSR Sensitivity ratios: “All Sensitivity, Employee Sensitivity, Society Sensitivity, Environment Sensitivity, and Governance Sensitivity”. |
| %Change in Ownership | It is the percentage difference in a fund's ownership (measured by shares) as a fraction of the firm. The percentage difference is between the current and the prior year. |
| Fund Return | It is the annual average of percentage monthly return of a fund. Monthly return is calculated via dividing the difference in net asset value of the fund between the current month and last month, by the net asset value of the last month. |
| Fund Size | It is the annual average of the fund's monthly total net asset value under management in million dollars. |
| Fund Activism | Total number of activism proposals by SRI Funds in the board meetings per firm per year. |
| Portfolio Return | It is the weighted average of annual stock returns of firms in the portfolio. Each stock return in the portfolio is weighted by the fund’s ownership percentage in that stock. |
| Portfolio Beta | It is the weighted average of stock betas in each portfolio. The betas are calculated using the market model. Each stock beta in the portfolio is weighted by the fund’s ownership percentage in that stock. |
| Invested | It is a dummy variable that equals one if the portfolio contains firms only with increased ownership of one specific fund, and zero otherwise. |
| FIRM CONTROL VARIABLES | |
| Firm Size | It is the natural logarithm of total assets. |
| M/B | It is the Market-to-Book ratio: (Common shares outstanding * closing price) / total assets |
| Profitability | It is the ratio of earnings before interest and taxes (EBIT) over total assets. |
| Leverage | It is the ratio of the sum of debt in current liabilities and long-term debt over total assets. |
| Volatility | It is the standard deviation of monthly stock returns. |
| Growth | It is the ratio of capital expenditures over sales. |
| Dividend | It is the ratio of dividend payments over (Common shares outstanding * closing price). |
| Cash | It is the ratio of cash over total assets. |
| R&D | It is the ratio of R&D expenditures over sales. |
| HHI | It is the TNIC Herfindahl index by Hoberg and Phillips (2010). |
